# Supplementary material for: Pharmacovigilance in juvenile idiopathic arthritis patients treated with biologic or synthetic drugs: combined data of more than 15,000 patients from Pharmachild and national registries
Source: PubMed Central journal article supplement (PMC6307151; doi:10.1186/s13075-018-1780-z), 2018-12-27

Additional File 1: Data flow from the individual site to the PRINTO coordinating centre.

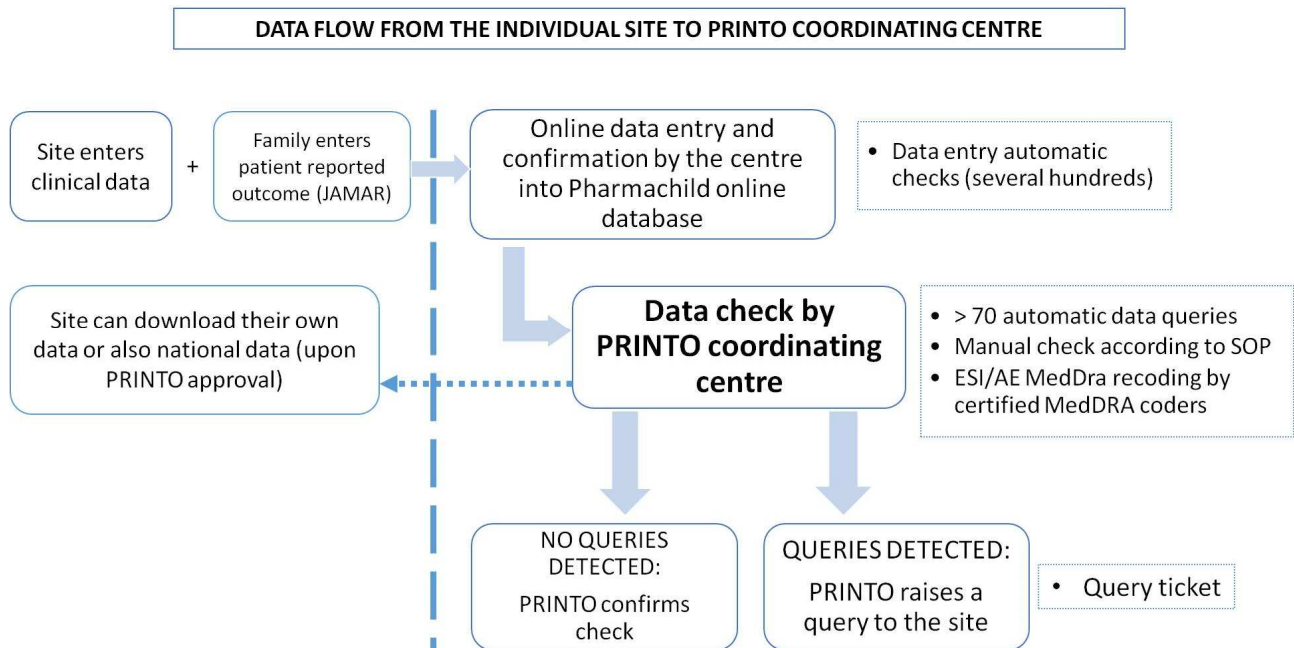

Supplement: 13075_2018_1780_MOESM1_ESM.pdf [file 13075_2018_1780_MOESM1_ESM.pdf]
